# Supplementary material for: Charge, adsorption, water stability and bandgap tuning of an anionic Cd(ii) porphyrinic metal–organic framework
Source: Royal Society of Chemistry journal article supplement (doi:10.1039/c9dt00478e), 2019-01-01
Supplement: c9dt00478e1.pdf [file c9dt00478e1.pdf]

## Supporting information

### Charge, Adsorption, Water Stability and Bandgap Tuning of An Anionic Cd(II) Porphyrinic Metal-Organic Framework

Qi Li,<sup>a</sup> Yanping Luo,<sup>ad</sup> Yue Ding,<sup>a</sup> Yina Wang,<sup>a</sup> Yuxin Wang,<sup>a</sup> Hongbin Du,<sup>b</sup> Rongxin Yuan,<sup>c</sup> Jianchun Bao,<sup>d</sup> Min Fang,<sup>\*ab</sup> Yong Wu<sup>\*a</sup>

- <sup>a</sup>. Jiangsu Key Laboratory of New Power Batteries, Jiangsu Collaborative Innovation Center of Biomedical Functional Materials, School of Chemistry and Materials Science, Nanjing Normal University, Nanjing 210023, PR China. Email: [fangmin@njnu.edu.cn](mailto:fangmin@njnu.edu.cn), [wuyong@njnu.edu.cn](mailto:wuyong@njnu.edu.cn)
- <sup>b</sup>. State Key Laboratory of Coordination Chemistry, Nanjing University, Nanjing 210093, China
- <sup>c</sup>. School of Chemistry and Materials Engineering, Changshu Institute of Technology, Changshu, 215500, China.
- <sup>d</sup>. Jiangsu Key Laboratory of Biofunctional Materials, School of Chemistry and Materials Science, Nanjing Normal University, Nanjing 210023, China.

\* Corresponding authors.

**Keywords:** Anionic MOF, metal porphyrinic framework, band edge position, band gap tuning, visible light, CO<sub>2</sub> reduction

## Contents

|                                                                                                                                                                                                                                                                                                                                                                                                    |                                     |
|----------------------------------------------------------------------------------------------------------------------------------------------------------------------------------------------------------------------------------------------------------------------------------------------------------------------------------------------------------------------------------------------------|-------------------------------------|
| Table S1 Crystallographic data for 1 and 1(6:1)-2d. ....                                                                                                                                                                                                                                                                                                                                           | 3                                   |
| Table S2 Selected bond distances (Å) and angles (degrees) for 1. ....                                                                                                                                                                                                                                                                                                                              | 4                                   |
| Table S3 Selected bond distances (Å) and angles (degrees) for 1(6:1)-2d. ....                                                                                                                                                                                                                                                                                                                      | 6                                   |
| Topology analysis of compound 1. ....                                                                                                                                                                                                                                                                                                                                                              | 8                                   |
| Fig. S1 4,4,8-c underlying net (nnu3) of compound 1. ....                                                                                                                                                                                                                                                                                                                                          | 8                                   |
| Fig. S2 The rod packing structure of compound 1. ....                                                                                                                                                                                                                                                                                                                                              | 8                                   |
| Fig. S3 The 2-nodal 4,6-coordinated 4,6T156 topology of compound 1. ....                                                                                                                                                                                                                                                                                                                           | 9                                   |
| IR spectra. ....                                                                                                                                                                                                                                                                                                                                                                                   | 10                                  |
| Fig. S4 IR spectra of 1-DMF, 1-ex, 1(4:1)-4d-DMF, 1(6:1)-4d-DMF, and 1(8:1)-4d-DMF (a); IR spectra of Li <sup>+</sup> -1-2d, Li <sup>+</sup> -1-5d, and Li <sup>+</sup> -1-10d (b); IR and Raman spectra of H <sub>6</sub> TCPD compared with IR spectra of 1-ex and 1(8:1)-4d-DMF (c). ....                                                                                                       | 10                                  |
| Fig. S5 TG/DTA of 1-ex (a) 1(4:1)-4d-ex (b) and 1(8:1)-4d-ex (c), Li <sup>+</sup> -1-2d (d), Li <sup>+</sup> -1-5d (e), and Li <sup>+</sup> -1-10d. ....                                                                                                                                                                                                                                           | <b>Error! Bookmark not defined.</b> |
| Fig. S6 PXRD spectrum of 1-DMF after two cycles of photocatalytic CO <sub>2</sub> reduction. ....                                                                                                                                                                                                                                                                                                  | 12                                  |
| Fig. S7 CO <sub>2</sub> (273 and 298 K) and CH <sub>4</sub> (273 and 298 K) adsorption/desorption isotherms of 1(4:1)-4d-ex (a), 1(6:1)-4d-ex (b), and 1(8:1)-4d-ex (c). ....                                                                                                                                                                                                                      | 13                                  |
| Fig. S8 CO <sub>2</sub> (273 and 298 K) and CH <sub>4</sub> (273 and 298 K) adsorption/desorption isotherms of Li <sup>+</sup> -1-5d (a) and Li <sup>+</sup> -1-10d (b). ....                                                                                                                                                                                                                      | 13                                  |
| Fig. S9 Band gaps of 1(4:1)-4d-ex, 1(6:1)-4d-ex, 1(8:1)-4d-ex, Li <sup>+</sup> -1-2d, Li <sup>+</sup> -1-5d, and Li <sup>+</sup> -1-10d determined by plots of ( <i>abs</i> or [ <i>abs</i> ( <i>hν</i> )] <sup>1/2</sup> or [ <i>abs</i> ( <i>hν</i> )] <sup>2</sup> versus <i>hν</i> . ....                                                                                                      | 14                                  |
| Fig. S10 Cathodic and anodic linear potential scans for determining the positions of the CB and VB edges of 1-DMF, 1-ex, and 1(8:1)-2d-DMF using pH=5.34 H <sub>2</sub> SO <sub>4</sub> aqueous solution or the Tris-HCl buffered saline solution (0.1 mol L <sup>-1</sup> , pH 7.4). ....                                                                                                         | 15                                  |
| Fig. S11 Cathodic and anodic linear potential scans for determining the positions of the CB and VB edges of 1(4:1)-4d-ex ((a)-(d)), 1(6:1)-4d-ex ((e)-(h)) and 1(8:1)-4d-ex ((i)-(l)) using two different electrolytes (the pH 5.01 H <sub>2</sub> SO <sub>4</sub> aqueous solution or the Tris-HCl buffered saline solution (0.1 mol·L <sup>-1</sup> , pH 7.4)). ....                             | 16                                  |
| Fig. S12 Cathodic and anodic linear potential scans for determining the positions of the CB and VB edges of Li <sup>+</sup> -1-2d ((a)-(d)), Li <sup>+</sup> -1-5d ((e)-(h)) and Li <sup>+</sup> -1-10d ((i)-(l)) using two different electrolytes (the pH 5.01 H <sub>2</sub> SO <sub>4</sub> aqueous solution or the Tris-HCl buffered saline solution (0.1 mol L <sup>-1</sup> , pH 7.4)). .... | 18                                  |

**Table S1 Crystallographic data for 1 and 1(6:1)-2d.**

| Compound                                                                    | 1                                                                                                  | 1(6:1)-2d                                                                                        |
|-----------------------------------------------------------------------------|----------------------------------------------------------------------------------------------------|--------------------------------------------------------------------------------------------------|
| Formula                                                                     | C <sub>114.20</sub> H <sub>98.80</sub> Cd <sub>3.20</sub> N <sub>14.60</sub><br>O <sub>23.50</sub> | C <sub>113.76</sub> H <sub>104.04</sub> Cd <sub>3.31</sub> N <sub>14.38</sub><br>O <sub>24</sub> |
| <i>F</i> <sub>w</sub>                                                       | 1933.17                                                                                            | 2408.47                                                                                          |
| Crystal system                                                              | Monoclinic                                                                                         | Monoclinic                                                                                       |
| Space group                                                                 | <i>C</i> 2/ <i>c</i>                                                                               | <i>C</i> 2/ <i>c</i>                                                                             |
| <i>a</i> (Å)                                                                | 7.089(2)                                                                                           | 7.0923 (16)                                                                                      |
| <i>b</i> (Å)                                                                | 26.513(8)                                                                                          | 26.431(6)                                                                                        |
| <i>c</i> (Å)                                                                | 30.078(8)                                                                                          | 30.165(8)                                                                                        |
| $\beta$ (°)                                                                 | 95.351(8)                                                                                          | 95.216(3)                                                                                        |
| <i>V</i> (Å <sup>3</sup> )                                                  | 5628(3)                                                                                            | 5631(2)                                                                                          |
| <i>Z</i>                                                                    | 2                                                                                                  | 2                                                                                                |
| <i>D</i> <sub>c</sub> (g/cm <sup>3</sup> )                                  | 1.423                                                                                              | 1.420                                                                                            |
| $\mu$ (mm <sup>-1</sup> )                                                   | 0.675                                                                                              | 0.695                                                                                            |
| <i>T</i> (K)                                                                | 296(2)                                                                                             | 296(2)                                                                                           |
| Total reflections                                                           | 32793                                                                                              | 56916                                                                                            |
| Unique data collected                                                       | 4906                                                                                               | 6167                                                                                             |
| Observed reflections                                                        | 3749                                                                                               | 3210                                                                                             |
| <i>R</i> <sub>int</sub>                                                     | 0.063                                                                                              | 0.142                                                                                            |
| <i>R</i> <sub>1</sub> , <i>wR</i> <sub>2</sub> ( <i>I</i> > 2σ( <i>I</i> )) | 0.0951, 0.2695                                                                                     | 0.086, 0.1761                                                                                    |
| <i>R</i> <sub>1</sub> , <i>wR</i> <sub>2</sub> (all data)                   | 0.1075, 0.2837                                                                                     | 0.1671, 0.2151                                                                                   |
| Goodness of fit on <i>F</i> <sup>2</sup>                                    | 1.141                                                                                              | 1.036                                                                                            |

**Table S2 Selected bond distances (Å) and angles (degrees) for 1.**

|               |           |                 |           |
|---------------|-----------|-----------------|-----------|
| C1—O2         | 1.24(2)   | C13—C14         | 1.467(9)  |
| C1—O1         | 1.293(16) | C1—C2           | 1.497(18) |
| C14—C15       | 1.3900    | C14—C19         | 1.3900    |
| C2—C3         | 1.3900    | C15—C16         | 1.3900    |
| C2—C7         | 1.3900    | C15—H15         | 0.9300    |
| C3—C4         | 1.3900    | C16—C17         | 1.3900    |
| C3—H3A        | 0.9599    | C16—H16         | 0.9300    |
| C4—C5         | 1.3900    | C17—C18         | 1.3900    |
| C4—H4A        | 0.9600    | C17—C20         | 1.561(11) |
| C5—C6         | 1.3900    | C18—C19         | 1.3900    |
| C5—C8         | 1.477(10) | C18—H18         | 0.9300    |
| C6—C7         | 1.3900    | C19—H19         | 0.9300    |
| C6—H6A        | 0.9601    | C7—H7A          | 0.9600    |
| O1—Cd2ii      | 2.314(8)  | O1—Cd2iii       | 2.355(8)  |
| O1—Cd1i       | 2.570(14) | O2—Cd1i         | 2.234(18) |
| C8—C24iv      | 1.339(12) | C8—C9           | 1.411(11) |
| C20—O4        | 1.247(9)  | C20—O3          | 1.250(8)  |
| C21—N2        | 1.372(9)  | C21—C22         | 1.421(12) |
| C22—C23       | 1.343(16) | C22—H22A        | 0.9300    |
| C23—C24       | 1.439(11) | C23—H23A        | 0.9300    |
| C24—N2        | 1.343(10) | Cd1—O4          | 2.424(7)  |
| Cd1—O4v       | 2.424(7)  | Cd1—O3          | 2.521(13) |
| Cd1—O3v       | 2.521(13) | Cd2—Cd2vi       | 0.598(2)  |
| C9—N1         | 1.373(11) | Cd2—O4vi        | 2.190(7)  |
| C9—C10        | 1.480(13) | Cd2—O4          | 2.559(6)  |
| C10—C11       | 1.326(15) | N2—H2A          | 0.8600    |
| C10—H10A      | 0.9300    | C11—C12         | 1.417(13) |
| C11—H11A      | 0.9300    | C12—N1          | 1.365(9)  |
| C12—C13       | 1.398(12) | C13—C21         | 1.400(13) |
| O2—C1—O1      | 124.1(17) | O2—C1—C2        | 116.6(12) |
| O1—C1—C2      | 119.3(16) | O2—C1—Cd1i      | 54.4(10)  |
| O1—C1—Cd1i    | 69.8(9)   | C2—C1—Cd1i      | 170.3(11) |
| C3—C2—C7      | 120.0     | C3—C2—C1        | 120.1(9)  |
| C7—C2—C1      | 119.8(9)  | C4—C3—C2        | 120.0     |
| C4—C3—H3A     | 120.0     | O4—C20—O3       | 121.8(6)  |
| C2—C3—H3A     | 120.0     | C3—C4—C5        | 120.0     |
| C3—C4—H4A     | 120.0     | O4—C20—C17      | 120.1(5)  |
| C5—C4—H4A     | 120.0     | O3—C20—C17      | 117.7(6)  |
| C6—C5—C4      | 120.0     | C6—C5—C8        | 121.9(6)  |
| C4—C5—C8      | 118.1(6)  | C5—C6—C7        | 120.0     |
| N2—C21—C13    | 127.7(6)  | C5—C6—H6A       | 120.0     |
| N2—C21—C22    | 107.3(9)  | C7—C6—H6A       | 120.0     |
| C13—C21—C22   | 125.0(7)  | C6—C7—C2        | 120.0     |
| C23—C22—C21   | 107.5(7)  | C6—C7—H7A       | 120.0     |
| C23—C22—H22A  | 126.3     | C2—C7—H7A       | 120.0     |
| C21—C22—H22A  | 126.3     | C1—O1—Cd2ii     | 134.2(8)  |
| C22—C23—C24   | 108.5(9)  | C1—O1—Cd2iii    | 141.2(8)  |
| C22—C23—H23A  | 125.7     | Cd2ii—O1—Cd2iii | 14.69(8)  |
| C24—C23—H23A  | 125.7     | C1—O1—Cd1i      | 82.1(11)  |
| C8iv—C24—N2   | 125.9(7)  | Cd2ii—O1—Cd1i   | 91.1(4)   |
| C8iv—C24—C23  | 127.4(9)  | Cd2iii—O1—Cd1i  | 104.3(4)  |
| N2—C24—C23    | 106.6(8)  | C1—O2—Cd1i      | 98.7(10)  |
| O2vii—Cd1—O2i | 77.5(10)  | C24iv—C8—C9     | 128.6(8)  |
| O2vii—Cd1—O4  | 125.0(5)  | O2i—Cd1—O4      | 86.0(5)   |
| C24iv—C8—C5   | 111.1(7)  | O2vii—Cd1—O4v   | 86.0(4)   |
| C9—C8—C5      | 120.2(9)  | O4—Cd1—O4v      | 142.2(8)  |
| O2i—Cd1—O4v   | 125.0(5)  | O2i—Cd1—O3      | 96.5(4)   |

|                  |           |                   |            |
|------------------|-----------|-------------------|------------|
| O2vii—Cd1—O3     | 173.9(7)  | O2vii—Cd1—O1i     | 84.9(6)    |
| O4—Cd1—O3        | 52.3(3)   | O2i—Cd1—O1i       | 54.9(5)    |
| C19—C14—C13      | 116.7(6)  | C20—O4—Cd2        | 153.8(5)   |
| C14—C15—C16      | 120.0     | Cd2vi—O4—Cd2      | 11.43(6)   |
| C14—C15—H15      | 120.0     | Cd1—O4—Cd2        | 102.7(4)   |
| C16—C15—H15      | 120.0     | C17—C16—C15       | 120.0      |
| C17—C16—H16      | 120.0     | C15—C16—H16       | 120.0      |
| C18—C17—C16      | 120.0     | C18—C17—C20       | 117.7(5)   |
| C16—C17—C20      | 121.7(5)  | C19—C18—C17       | 120.0      |
| C19—C18—H18      | 120.0     | C17—C18—H18       | 120.0      |
| C18—C19—C14      | 120.0     | C18—C19—H19       | 120.0      |
| C14—C19—H19      | 120.0     | O2—C1—C2—C3       | -10.0(16)  |
| C21—C13—C14—C19  | -76.8(9)  | C17—C20—O4—Cd2    | -44.1(19)  |
| O1—C1—C2—C3      | 169.9(9)  | C19—C14—C15—C16   | 0.0        |
| O2—C1—C2—C7      | 167.5(11) | C13—C14—C15—C16   | 169.7(11)  |
| O1—C1—C2—C7      | -12.6(14) | C14—C15—C16—C17   | 0.0        |
| C7—C2—C3—C4      | 0.0       | C15—C16—C17—C18   | 0.0        |
| C1—C2—C3—C4      | 177.5(9)  | C15—C16—C17—C20   | -171.0(10) |
| C2—C3—C4—C5      | 0.0       | C16—C17—C18—C19   | 0.0        |
| C3—C4—C5—C6      | 0.0       | C20—C17—C18—C19   | 171.4(10)  |
| C3—C4—C5—C8      | 179.0(8)  | C17—C18—C19—C14   | 0.0        |
| C4—C5—C6—C7      | 0.0       | C15—C14—C19—C18   | 0.0        |
| C8—C5—C6—C7      | -178.9(9) | C13—C14—C19—C18   | -170.3(11) |
| C5—C6—C7—C2      | 0.0       | C3—C2—C7—C6       | 0.0        |
| C1—C2—C7—C6      | -177.5(9) | C12—C13—C14'—C19' | 98.3(13)   |
| O2—C1—O1—Cd2ii   | 87.5(19)  | C2—C1—O1—Cd2ii    | -92.4(17)  |
| Cd1i—C1—O1—Cd2ii | 83.8(13)  | O2—C1—O1—Cd2iii   | 106.8(19)  |
| C2—C1—O1—Cd2iii  | -73(2)    | Cd1i—C1—O1—Cd2iii | 103.0(16)  |
| O2—C1—O1—Cd1i    | 3.8(15)   | C2—C1—O1—Cd1i     | -176.1(11) |
| O1—C1—O2—Cd1i    | -4.3(17)  | C2—C1—O2—Cd1i     | 175.6(9)   |
| C6—C5—C8—C24iv   | 57.8(9)   | C4—C5—C8—C24iv    | -121.2(7)  |
| C6—C5—C8—C9      | -118.1(9) | C4—C5—C8—C9       | 62.9(10)   |
| C18—C17—C20—O4   | 2.1(13)   | C17—C20—O4        | 173.3(7)   |
| C18—C17—C20—O3   | 174.8(8)  | C17—C20—O3        | -14.0(12)  |
| C13—C21—N2       | 1.9(12)   | C14—C13—C21—N2    | 178.1(7)   |
| C13—C21—N2       | 166.2(12) | C12—C13—C21—C22   | -179.2(8)  |
| C13—C21—C22      | -3.0(11)  | C13—C21—C22       | -14.9(15)  |
| N2—C21—C22—C23   | -0.4(10)  | C21—C22—C23       | -179.5(8)  |
| C21—C22—C23—C24  | 0.4(10)   | C22—C23—C24—C8iv  | -176.2(9)  |
| C22—C23—C24—N2   | -0.2(10)  | C13—C12—N1—C9     | 175.9(7)   |
| C11—C12—N1—C9    | -2.7(9)   | C8—C9—N1—C12      | -175.6     |
| C24iv—C8—C9—N1   | -1.6(14)  | C10—C9—N1—C12     | 4.5(10)    |
| C5—C8—C9—N1      | 173.5(8)  | C8iv—C24—N2—C21   | 176.0(7)   |
| C24iv—C8—C9—C10  | 178.3(10) | C23—C24—N2—C21    | -0.1(8)    |
| C5—C8—C9—C10     | -6.6(14)  | C13—C21—N2—C24    | 179.4(7)   |
| C22—C21—N2—C24   | 0.3(8)    | N1—C9—C10—C11     | -4.6(12)   |
| C8—C9—C10—C11    | 175.5(10) | O4—C20—O3—Cd1     | -11.3(10)  |
| C9—C10—C11—C12   | 2.9(13)   | C17—C20—O3—Cd1    | 176.1(9)   |
| C10—C11—C12—N1   | -0.2(13)  | C10—C11—C12—C13   | -178.8(9)  |
| N1—C12—C13—C21   | 1.3(12)   | O3—C20—O4—Cd2vi   | 124.6(8)   |
| C11—C12—C13—C21  | 179.6(9)  | C17—C20—O4—Cd2vi  | -62.9(15)  |
| N1—C12—C13—C14   | -174.4(8) | O3—C20—O4—Cd1     | 11.8(10)   |
| C11—C12—C13—C14  | 3.9(13)   | C17—C20—O4—Cd1    | -175.7(10) |
| C12—C13—C14—C15  | -70.6(11) | C21—C13—C14—C15   | 113.2(7)   |
| O3—C20—O4—Cd2    | 143.4(9)  | C12—C13—C14—C19   | 99.4(9)    |

Symmetry codes: (i)  $-x+1, -y+1, -z+1$ ; (ii)  $-x, -y+1, -z+1$ ; (iii)  $x-1, -y+1, z-1/2$ ; (iv)  $-x-1/2, -y+1/2, -z+1$ ; (v)  $-x+2, y, -z+3/2$ ; (vi)  $-x+1, y, -z+3/2$ ; (vii)  $x+1, -y+1, z+1/2$ .

**Table S3 Selected bond distances (Å) and angles (degrees) for 1(6:1)-2d.**

|                  |       |      |                 |       |      |
|------------------|-------|------|-----------------|-------|------|
| Cd1—O2           | 2.344 | (5)  | C21B—C20B       | 1.41  | (2)  |
| Cd1—O2i          | 2.344 | (5)  | C13B—C14B       | 1.45  | (3)  |
| Cd1—O1i          | 2.353 | (6)  | C18B—C17B       | 1.51  | (2)  |
| Cd1—O1           | 2.353 | (6)  | C14B—H14B       | 0.930 |      |
| Cd1—O3Bii        | 2.402 | (11) | C22B—H22B       | 0.930 |      |
| Cd1—O3Biii       | 2.402 | (11) | C20B—H20B       | 0.930 |      |
| Cd1—O4Aiii       | 2.117 | (19) | O4A—C24A        | 1.238 | (18) |
| Cd1—O4Aii        | 2.117 | (19) | O3A—C24A        | 1.262 | (18) |
| Cd2—O2iv         | 2.375 | (6)  | N2A—C13A        | 1.31  | (7)  |
| Cd2—O2v          | 2.375 | (6)  | N2A—C16A        | 1.63  | (9)  |
| Cd2—O4Bvi        | 2.340 | (8)  | C13A—C14A       | 1.40  | (7)  |
| Cd2—O4Bvii       | 2.340 | (8)  | C21A—C22A       | 1.44  | (4)  |
| Cd2—O3Aviii      | 2.438 | (18) | C21A—C24A       | 1.515 | (18) |
| Cd2—O3A          | 2.439 | (18) | C21A—C20A       | 1.42  | (4)  |
| O2—C1            | 1.245 | (9)  | C14A—H14A       | 0.930 |      |
| O1—C1            | 1.234 | (8)  | C14A—C15A       | 1.45  | (6)  |
| N1—H1            | 0.860 |      | C19A—H19A       | 0.930 |      |
| N1—C12           | 1.355 | (10) | C19A—C18A       | 1.43  | (4)  |
| N1—C9            | 1.368 | (9)  | C19A—C20A       | 1.38  | (4)  |
| C12—C11          | 1.450 | (12) | C22A—H22A       | 0.930 |      |
| C12—C17Bix       | 1.462 | (19) | C22A—C23A       | 1.35  | (4)  |
| C12—C17Aix       | 1.27  | (4)  | C15A—H15A       | 0.930 |      |
| C10—H10          | 0.930 |      | C15A—C16A       | 1.40  | (6)  |
| C10—C11          | 1.362 | (13) | C17A—C18A       | 1.51  | (2)  |
| C10—C9           | 1.426 | (13) | C17A—C16A       | 1.41  | (5)  |
| C11—H11          | 0.930 |      | C23A—H23A       | 0.930 |      |
| C9—C8            | 1.380 | (11) | C23A—C18A       | 1.38  | (4)  |
| C8—C13B          | 1.28  | (2)  | C20A—H20A       | 0.930 |      |
| C8—C13A          | 1.64  | (4)  | C3B—H3B         | 0.930 |      |
| C8—C5B           | 1.496 | (9)  | C3B—C2B         | 1.390 |      |
| C8—C5A           | 1.58  | (3)  | C3B—C4B         | 1.390 |      |
| C1—C2B           | 1.517 | (9)  | C2B—C7B         | 1.390 |      |
| C1—C2A           | 1.45  | (3)  | C7B—H7B         | 0.930 |      |
| O4B—C24B         | 1.248 | (12) | C7B—C6B         | 1.390 |      |
| O3B—C24B         | 1.225 | (14) | C6B—H6B         | 0.930 |      |
| N2B—C16B         | 1.27  | (4)  | C6B—C5B         | 1.390 |      |
| N2B—C13B         | 1.43  | (3)  | C5B—C4B         | 1.390 |      |
| C16B—C15B        | 1.47  | (2)  | C4B—H4B         | 0.930 |      |
| C16B—C17B        | 1.37  | (2)  | C5A—C6A         | 1.390 |      |
| C19B—H19B        | 0.930 |      | C5A—C4A         | 1.390 |      |
| C19B—C18B        | 1.376 | (18) | C6A—H6A         | 0.930 |      |
| C19B—C20B        | 1.339 | (19) | C6A—C7A         | 1.390 |      |
| C15B—H15B        | 0.930 |      | C7A—H7A         | 0.930 |      |
| C15B—C14B        | 1.32  | (3)  | C7A—C2A         | 1.390 |      |
| C23B—H23B        | 0.930 |      | C2A—C3A         | 1.390 |      |
| C23B—C18B        | 1.32  | (2)  | C3A—H3A         | 0.930 |      |
| C23B—C22B        | 1.39  | (2)  | C3A—C4A         | 1.390 |      |
| C21B—C24B        | 1.549 | (19) | C4A—H4A         | 0.930 |      |
| C21B—C22B        | 1.388 | (18) |                 |       |      |
| O2—Cd1—O2i       | 153.1 | (3)  |                 |       |      |
| O2i—Cd1—O1i      | 54.45 | (18) |                 |       |      |
| O2—Cd1—O1        | 54.45 | (18) | C23B—C18B—C19B  | 120.4 | (15) |
| O2—Cd1—O1i       | 106.1 | (2)  | C23B—C18B—C17B  | 121.3 | (14) |
| O2i—Cd1—O1       | 106.1 | (2)  | C15B—C14B—C13B  | 108.3 | (15) |
| O2i—Cd1—C1i      | 27.41 | (19) | C15B—C14B—H14B  | 125.8 |      |
| O2—Cd1—C1i       | 131.8 | (3)  | C13B—C14B—H14B  | 125.8 |      |
| O2i—Cd1—O3Biii   | 119.1 | (3)  | O4B—C24B—C21B   | 118.7 | (13) |
| O2—Cd1—O3Biii    | 84.0  | (3)  | O3B—C24B—O4B    | 125.2 | (15) |
| O2—Cd1—O3Bii     | 119.1 | (3)  | O3B—C24B—C21B   | 116.1 | (11) |
| O2i—Cd1—O3Bii    | 84.0  | (3)  | C23B—C22B—H22B  | 120.7 |      |
| O1i—Cd1—O1       | 98.3  | (3)  | C21B—C22B—C23B  | 118.7 | (14) |
| O1i—Cd1—C1i      | 27.15 | (19) | C21B—C22B—H22B  | 120.7 |      |
| O1—Cd1—C1i       | 105.5 | (3)  | C19B—C20B—C21B  | 120.1 | (12) |
| O1—Cd1—O3Biii    | 96.2  | (3)  | C19B—C20B—H20B  | 119.9 |      |
| O1i—Cd1—O3Biii   | 165.3 | (3)  | C21B—C20B—H20B  | 119.9 |      |
| O1i—Cd1—O3Bii    | 96.2  | (3)  | C12ix—C17B—C18B | 117.1 | (13) |
| O1—Cd1—O3Bii     | 165.3 | (3)  | C16B—C17B—C12ix | 128.9 | (17) |
| O3Biii—Cd1—C1i   | 144.2 | (3)  | C16B—C17B—C18B  | 113.9 | (16) |
| O3Bii—Cd1—C1i    | 88.5  | (3)  | C24A—O3A—Cd2    | 138.2 | (16) |
| O3Bii—Cd1—O3Biii | 69.3  | (6)  | C13A—N2A—C16A   | 96    | (4)  |

|                    |       |      |                 |       |     |
|--------------------|-------|------|-----------------|-------|-----|
| O4Aii—Cd1—O2       | 113.9 | (6)  | N2A—C13A—C8     | 113   | (5) |
| O4Aiii—Cd1—O2      | 82.2  | (6)  | N2A—C13A—C14A   | 122   | (5) |
| O4Aii—Cd1—O1       | 166.5 | (6)  | C14A—C13A—C8    | 125   | (4) |
| O4Aiii—Cd1—O1      | 77.6  | (6)  | C22A—C21A—C24A  | 120   | (2) |
| O2iv—Cd2—O2v       | 81.4  | (3)  | C20A—C21A—C22A  | 117   | (2) |
| O2v—Cd2—O3Aviii    | 155.2 | (6)  | C20A—C21A—C24A  | 123   | (2) |
| O2iv—Cd2—O3A       | 155.2 | (6)  | C13A—C14A—H14A  | 127.8 |     |
| O2iv—Cd2—O3Aviii   | 78.2  | (5)  | C13A—C14A—C15A  | 104   | (4) |
| O2v—Cd2—O3A        | 78.2  | (5)  | C15A—C14A—H14A  | 127.8 |     |
| O4Bvi—Cd2—O2iv     | 106.2 | (2)  | C18A—C19A—H19A  | 118.8 |     |
| O4Bvii—Cd2—O2iv    | 76.8  | (3)  | C20A—C19A—H19A  | 118.8 |     |
| O4Bvi—Cd2—O2v      | 76.8  | (3)  | C20A—C19A—C18A  | 122   | (3) |
| O4Bvii—Cd2—O2v     | 106.2 | (2)  | C21A—C22A—H22A  | 120.8 |     |
| O4Bvi—Cd2—O4Bvii   | 176.2 | (4)  | C23A—C22A—C21A  | 118   | (3) |
| O4Bvi—Cd2—O3Aviii  | 95.5  | (5)  | C23A—C22A—H22A  | 120.8 |     |
| O4Bvii—Cd2—O3Aviii | 82.8  | (5)  | C14A—C15A—H15A  | 126.8 |     |
| O3Aviii—Cd2—O3A    | 124.8 | (11) | C16A—C15A—C14A  | 106   | (4) |
| Cd1—O2—Cd2iii      | 105.7 | (2)  | C16A—C15A—H15A  | 126.8 |     |
| C1—O2—Cd1          | 92.5  | (4)  | C12ix—C17A—C18A | 120   | (3) |
| C1—O2—Cd2iii       | 149.9 | (5)  | C12ix—C17A—C16A | 117   | (3) |
| C1—O1—Cd1          | 92.4  | (5)  | C16A—C17A—C18A  | 122   | (4) |
| C12—N1—H1          | 125.7 |      | C22A—C23A—H23A  | 116.2 |     |
| C12—N1—C9          | 108.7 | (7)  | C22A—C23A—C18A  | 128   | (3) |
| C9—N1—H1           | 125.7 |      | C18A—C23A—H23A  | 116.2 |     |
| N1—C12—C11         | 108.4 | (7)  | C19A—C18A—C17A  | 123   | (3) |
| N1—C12—C17Bix      | 123.2 | (10) | C23A—C18A—C19A  | 114   | (3) |
| C11—C12—C17Bix     | 128.1 | (11) | C23A—C18A—C17A  | 123   | (3) |
| C17Aix—C12—N1      | 134.7 | (18) | C15A—C16A—N2A   | 110   | (4) |
| C17Aix—C12—C11     | 116.3 | (17) | C15A—C16A—C17A  | 122   | (5) |
| C11—C10—H10        | 126.1 |      | C17A—C16A—N2A   | 128   | (4) |
| C11—C10—C9         | 107.8 | (8)  | O4A—C24A—O3A    | 128   | (2) |
| C9—C10—H10         | 126.1 |      | O4A—C24A—C21A   | 115   | (2) |
| C12—C11—H11        | 126.7 |      | O3A—C24A—C21A   | 117   | (2) |
| C10—C11—C12        | 106.6 | (9)  | C21A—C20A—H20A  | 119.6 |     |
| C10—C11—H11        | 126.7 |      | C19A—C20A—C21A  | 121   | (3) |
| N1—C9—C10          | 108.5 | (8)  | C19A—C20A—H20A  | 119.6 |     |
| N1—C9—C8           | 126.6 | (8)  | C2B—C3B—H3B     | 120.0 |     |
| C8—C9—C10          | 124.8 | (7)  | C2B—C3B—C4B     | 120.0 |     |
| C9—C8—C13A         | 124   | (2)  | C4B—C3B—H3B     | 120.0 |     |
| C9—C8—C5B          | 120.2 | (9)  | C3B—C2B—C1      | 118.0 | (5) |
| C9—C8—C5A          | 109.2 | (18) | C7B—C2B—C1      | 121.8 | (5) |
| C13B—C8—C9         | 126.2 | (12) | C7B—C2B—C3B     | 120.0 |     |
| O2—C1—C2B          | 120.8 | (6)  | C2B—C7B—H7B     | 120.0 |     |
| O2—C1—C2A          | 115.8 | (16) | C2B—C7B—C6B     | 120.0 |     |
| O1—C1—O2           | 120.2 | (7)  | C6B—C7B—H7B     | 120.0 |     |
| O1—C1—C2B          | 119.0 | (7)  | C7B—C6B—H6B     | 120.0 |     |
| O1—C1—C2A          | 123.6 | (15) | C5B—C6B—C7B     | 120.0 |     |
| C24B—O4B—Cd2x      | 137.0 | (8)  | C5B—C6B—H6B     | 120.0 |     |
| C24B—O3B—Cd1v      | 98.4  | (9)  | C6B—C5B—C8      | 121.8 | (6) |
| C16B—N2B—C13B      | 113.2 | (17) | C6B—C5B—C4B     | 120.0 |     |
| N2B—C16B—C15B      | 106.0 | (19) | C4B—C5B—C8      | 118.1 | (6) |
| N2B—C16B—C17B      | 125   | (2)  | C3B—C4B—H4B     | 120.0 |     |
| C17B—C16B—C15B     | 129   | (2)  | C5B—C4B—C3B     | 120.0 |     |
| C18B—C19B—H19B     | 119.7 |      | C5B—C4B—H4B     | 120.0 |     |
| C20B—C19B—H19B     | 119.7 |      | C6A—C5A—C8      | 117   | (2) |
| C20B—C19B—C18B     | 120.7 | (14) | C6A—C5A—C4A     | 120.0 |     |
| C16B—C15B—H15B     | 125.4 |      | C4A—C5A—C8      | 123   | (2) |
| C14B—C15B—C16B     | 109.2 | (18) | C5A—C6A—H6A     | 120.0 |     |
| C14B—C15B—H15B     | 125.4 |      | C7A—C6A—C5A     | 120.0 |     |
| C18B—C23B—H23B     | 119.2 |      | C7A—C6A—H6A     | 120.0 |     |
| C18B—C23B—C22B     | 121.7 | (14) | C6A—C7A—H7A     | 120.0 |     |
| C22B—C23B—H23B     | 119.2 |      | C2A—C7A—C6A     | 120.0 |     |
| C22B—C21B—C24B     | 120.5 | (13) | C2A—C7A—H7A     | 120.0 |     |
| C22B—C21B—C20B     | 118.2 | (13) | C7A—C2A—C1      | 116   | (2) |
| C20B—C21B—C24B     | 121.3 | (11) | C7A—C2A—C3A     | 120.0 |     |
| C8—C13B—N2B        | 132   | (2)  | C3A—C2A—C1      | 124   | (2) |
| C8—C13B—C14B       | 125.2 | (17) | C2A—C3A—H3A     | 120.0 |     |
| N2B—C13B—C14B      | 103.1 | (18) | C4A—C3A—C2A     | 120.0 |     |
| C19B—C18B—C17B     | 118.2 | (14) | C4A—C3A—H3A     | 120.0 |     |
|                    |       |      | C5A—C4A—H4A     | 120.0 |     |
|                    |       |      | C3A—C4A—C5A     | 120.0 |     |

Symmetry codes: (i)  $-x+3, y, -z+3/2$ ; (ii)  $-x+3/2, y+1/2, -z+3/2$ ; (iii)  $x+3/2, y+1/2, z$ ; (iv)  $-x+1/2, y-1/2, -z+3/2$ ; (v)  $x-3/2, y-1/2, z$ ; (vi)  $-x, y, -z+3/2$ ; (vii)  $x-1, y, z$ ; (viii)  $-x-1, y, -z+3/2$ ; (ix)  $-x+1/2, -y+3/2, -z+1$ ; (x)  $x+1, y, z$ .



## Topology analysis of compound 1

The topology of compound **1** was performed with the ToposPro program package and the TTD collection of periodic network topologies.<sup>1</sup> If we carry out simplification by standard procedure, we obtain a 4,4,8-c net, which is a new trinodal network (Fig. S1(d)). It will be named *nnu3* and will be added to TTD-collection in the following update. The point symbol of the net is  $(4^4.6^2)_2(4^8.6^4.8^{16})$ . Both types of 4-coordinated nodes correspond to Cd atoms (Fig. S1(a) and Fig. S1(b)), the 8-coordinated nodes are the centers of mass of 5,10,15,20-*tetrakis*(4-carboxylatophenyl) porphyrin ligands (Fig. S1(c)).

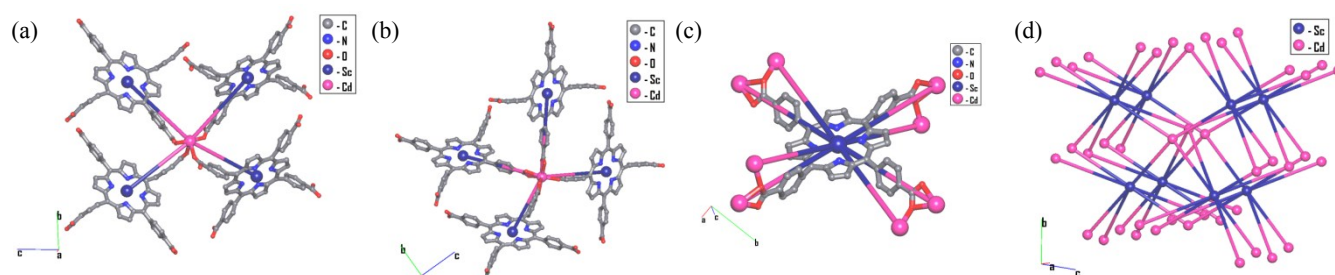

**Fig. S1 4,4,8-c underlying net (*nnu3*) of compound 1.**

(a) the coordination mode of one sort of Cd atoms. (b) the coordination mode of second sort of Cd atoms. (c) the O<sup>44</sup> coordination mode of a 5,10,15,20-*tetrakis*(4-Carboxylatophenyl)porphyrin ligand. (d) the overall net.

Another method of analysis of compound **1** is the cluster simplification procedure. Compound **1** contains one-periodic secondary building units, they are called rod SBUs (Fig. S2(a)).<sup>2</sup> The composition of infinite rod is  $[\text{CdC}_2\text{O}_4]_n$ . The Cd atoms form two types of polyhedra: trigonotetrahedron (8 O atoms) and tetrahedron (4 O atoms), which share the opposite edges (Fig. S2(b)). Each rod SBU is connected to eight other rods by four ligands as shown in Fig. S2(c). If we project atoms on the (100) plane (Fig. S2(c)), we can conclude, that there are two kinds of nonequivalent 4-coordinated nodes: the projections of the middle lines of the rods and the centers of the mass of the ligands. As a result, structure has tetragonal rod packing.

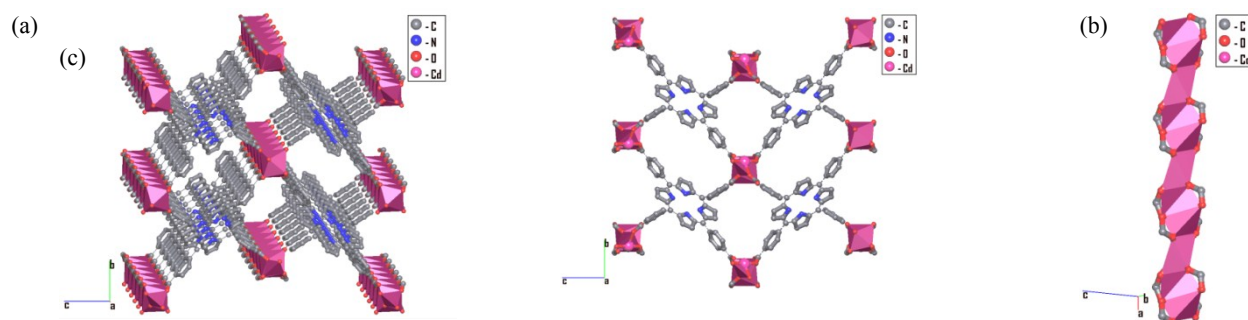

**Fig. S2 The rod packing structure of compound 1**

(a) the parallel rod SBUs, (b) the projection of parallel rod SBUs on the (100) plane, (c) the  $[\text{CdC}_2\text{O}_4]_n$  rod constructed by edge-sharing polyhedra.

Compound **1** can be simplified in a third way by the cluster simplification method. This method proposes to consider some valence bonds, in particular, C1-C2, C5-C8, C13-C14 and C17-C20 as intercluster (Fig. S3(a)). Additionally, we manually changed all valence bonds of Cd2 atoms to intercluster for isolation of the  $\text{CdC}_4\text{O}_8$  clusters, which contain only Cd1 atoms (Fig. S3(b)). Now, there are no parallel infinite valence bonded  $\text{CdC}_2\text{O}_4$  clusters and we can provide the second step of the classical cluster simplification procedure: all valence-bonded groups should be contracted to their centers of mass. The resulting underlying net is 2-nodal 4,6-coordinated with point symbol  $(4^2.6^4)(4^2.6^8.7^3.8^2)$ . Topological type is 4,6T156. The coordination modes of the central atoms, ligands and the underlying net itself are showed in Fig. S3(c)-(f).

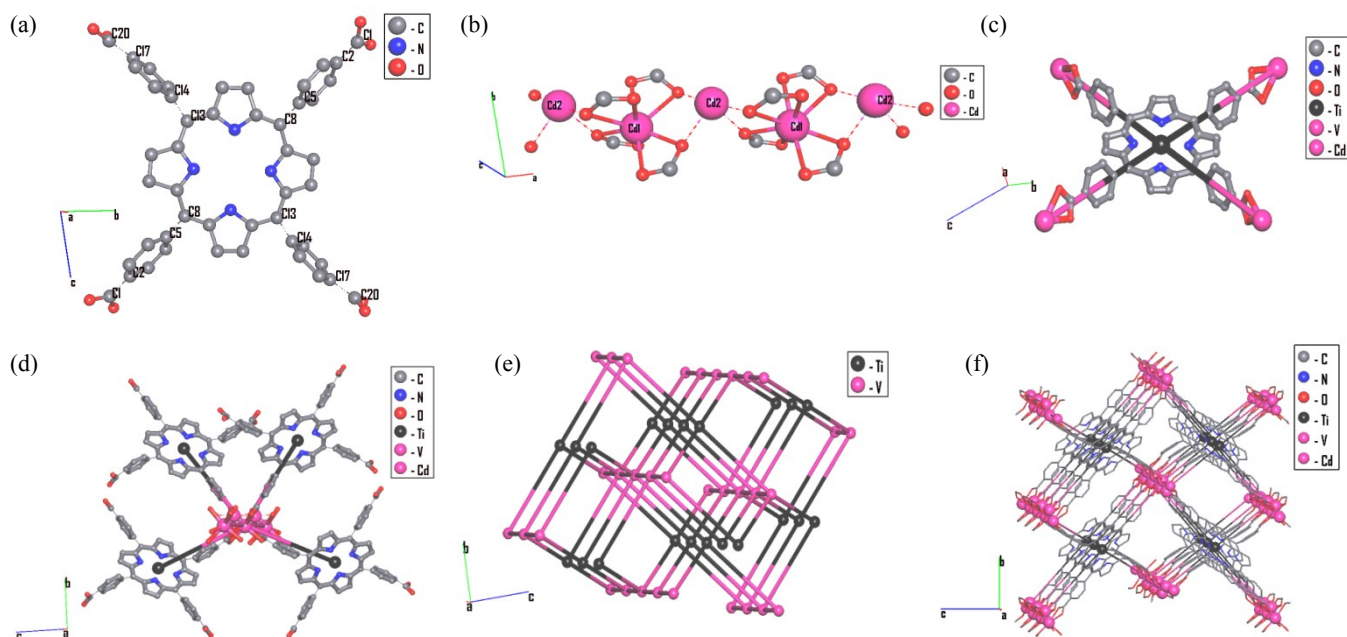

**Fig. S3 The 2-nodal 4,6-coordinated 4,6T156 topology of compound 1.**

(a) 5,10,15,20-*tetrakis*(4-Carboxylatophenyl)porphyrin) ligand after cluster simplification. (b) Separated clusters with the composition  $\text{CdC}_4\text{O}_8$  (Cd1) by Cd2 atoms. (c) The coordination mode of a 5,10,15,20-*tetrakis*(4-carboxylatophenyl)porphyrin) ligand. Black balls is the center of mass of the ligand; magenta balls are centers of mass of the  $\text{CdC}_4\text{O}_8$  clusters (they coincide with Cd atoms). (d) the coordination mode of a Cd1 atom. (e) 4,6T156 net (f) the initial structure and the 4,6T156 net are combined.

The TTD collection contains only five records for 4,6T156 topological type. There is an isostructural series of four compounds, which are constructed by the same ligand (5,10,15,20-*tetrakis*(4-carboxylatophenyl)porphyrin)),<sup>3</sup> the fifth compound contains a  $\mu$ -4,4',4'',4'''-pyrene-1,3,6,8-tetrayltetrabenzoate ligand.<sup>4</sup>

## IR spectra

We recorded the IR spectrum of  $H_6$ TCPP, which is consistent with the reported spectrum.<sup>5</sup> We also recorded the Raman spectrum of  $H_6$ TCPP (Fig. S4(c)). The IR spectra of **1**-DMF, **1**(4:1)-4d-DMF, **1**(6:1)-4d-DMF and **1**(8:1)-4d-DMF (Fig. S4(a)) are all the same, showing a band at  $1707\text{ cm}^{-1}$  which is too high to be assigned to a C=O stretching of DMF molecules ( $1670\text{--}1690\text{ cm}^{-1}$ ). By comparing the IR spectrum of **1**(8:1)-4d-DMF with those of **1**-ex and  $H_6$ TCPP in Fig. S4(c), we think this band is due to  $H_6$ TCPP trapped between crystals or in the channels, which was not washed completely away by DMF solvent. In contrast, the solvent exchanged sample (**1**-ex) contains no  $H_6$ TCPP and DMF molecules and should represent the IR spectrum of compound **1**. The IR peaks of  $H_6$ TCPP at  $3420$ ,  $1695$ ,  $1405$ , and  $1265\text{ cm}^{-1}$  (Fig. S4(c)) are assigned to the stretching vibrations of O-H, C=O, and C-O bonds of carboxylic acid groups according to literature.<sup>5-7</sup> Consistently, the Raman spectrum of  $H_6$ TCPP (Fig. S4(c)) shows no strong peaks in the range of those frequencies since these bonds are all very polar. The strong band at  $1605$  and the weak peak at  $1560\text{ cm}^{-1}$  were assigned by others to C=C and C=N stretchings.<sup>5-7</sup> The C=O distances are varied in a relatively large range according to the crystal structure of **1** (e.g.  $1.2500(74)$ ,  $1.26(2)$  and  $1.29(2)\text{ \AA}$  in **1**). Thus it is possible there are two bands due to asymmetric stretching of  $\text{CO}_2^-$ . Since  $1541\text{ cm}^{-1}$  is very strong, it should not be a C=C stretching band, we therefore assigned the strong bands at  $1603$  and  $1541\text{ cm}^{-1}$  to asymmetric stretching of  $\text{CO}_2^-$ , and the strong peak at  $1387\text{ cm}^{-1}$  to symmetric stretching of  $\text{CO}_2^-$ .

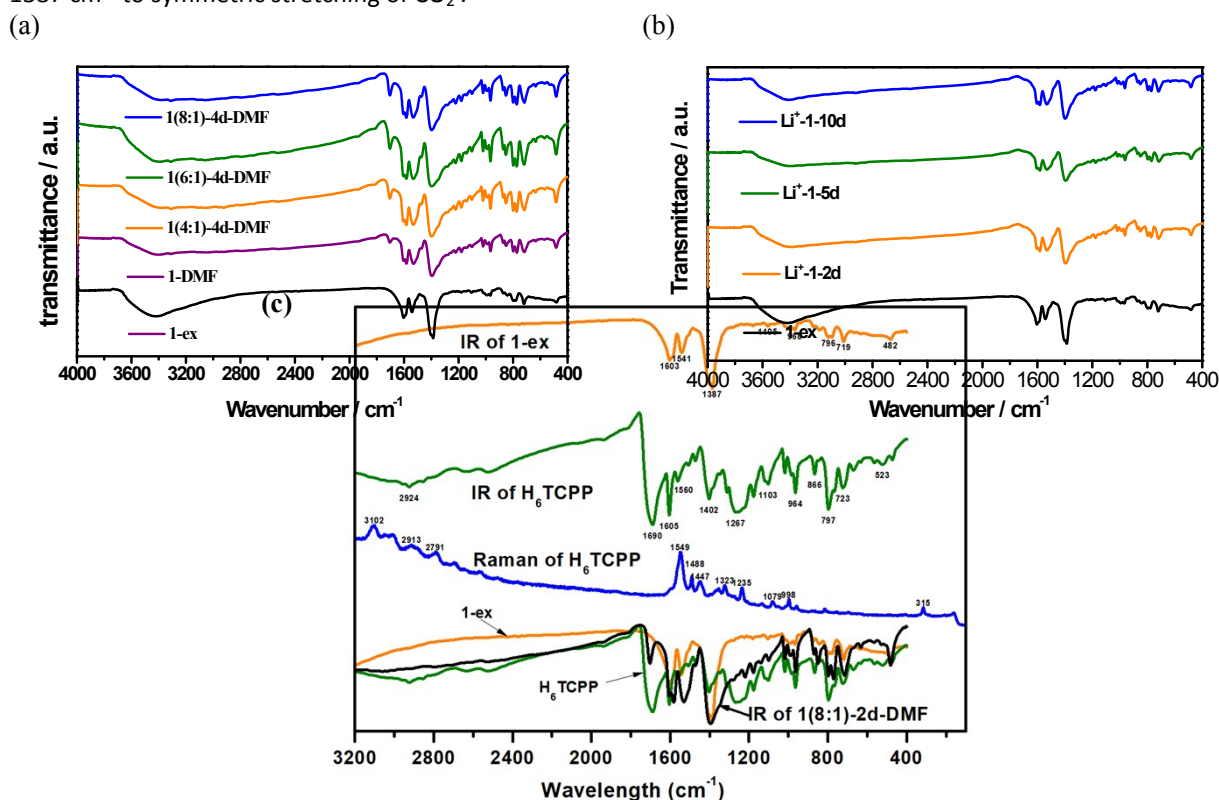

Fig. S4 IR spectra of **1**-DMF, **1**-ex, **1**(4:1)-4d-DMF, **1**(6:1)-4d-DMF, and **1**(8:1)-4d-DMF (a); IR spectra of  $\text{Li}^+$ -1-2d,  $\text{Li}^+$ -1-5d, and  $\text{Li}^+$ -1-10d (b); IR and Raman spectra of  $H_6$ TCPP compared with IR spectra of **1**-ex and **1**(8:1)-4d-DMF (c).

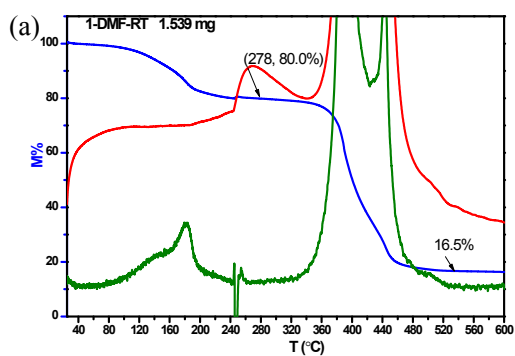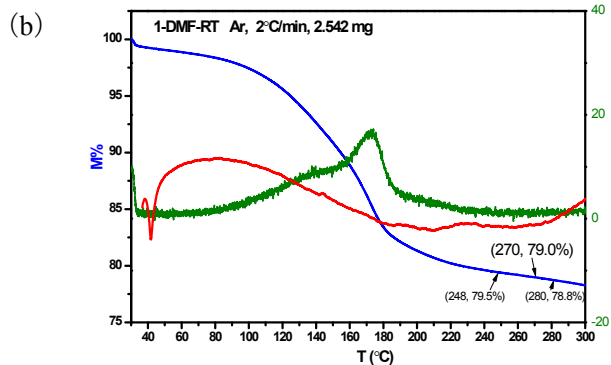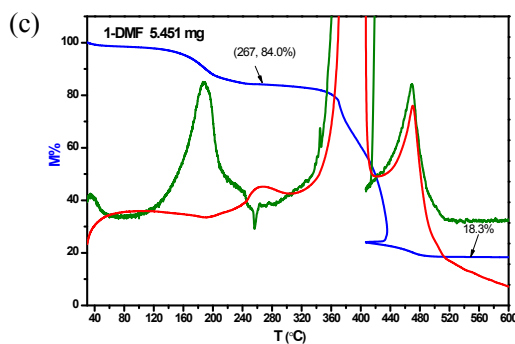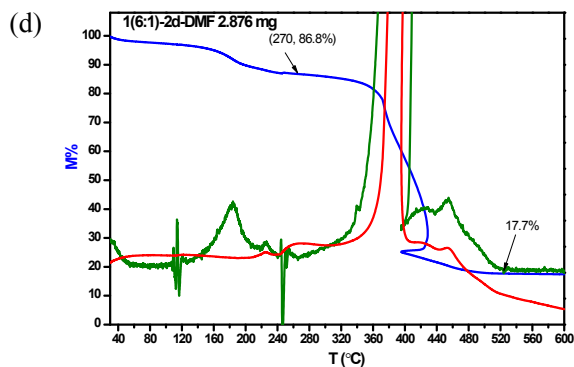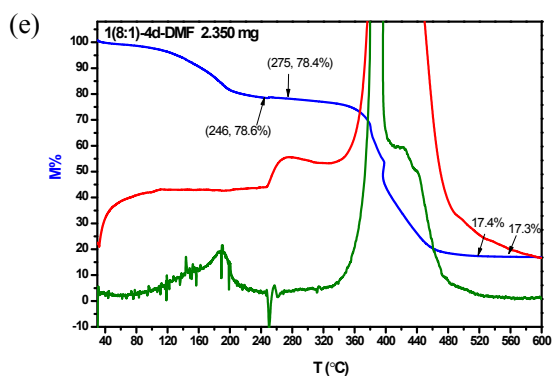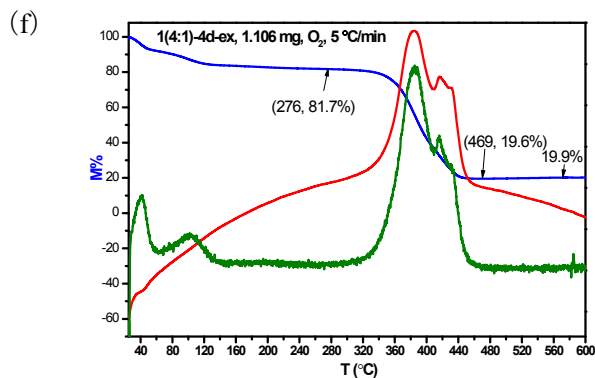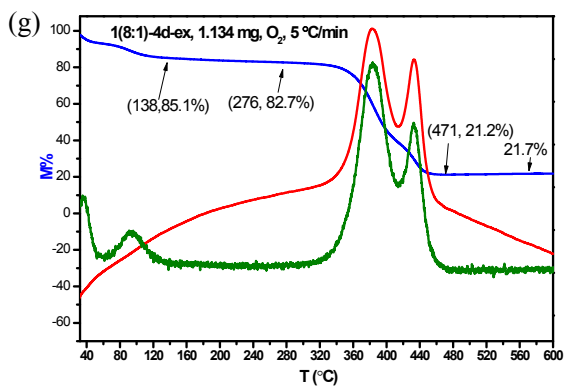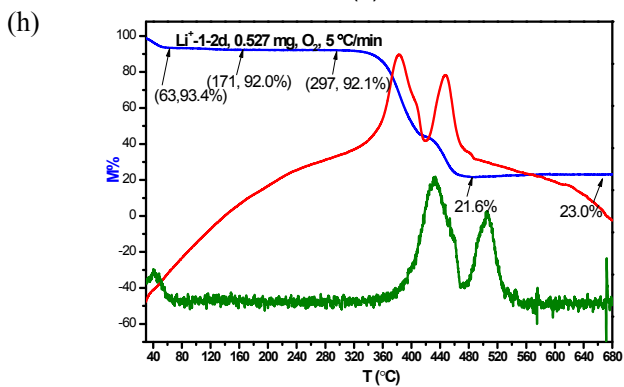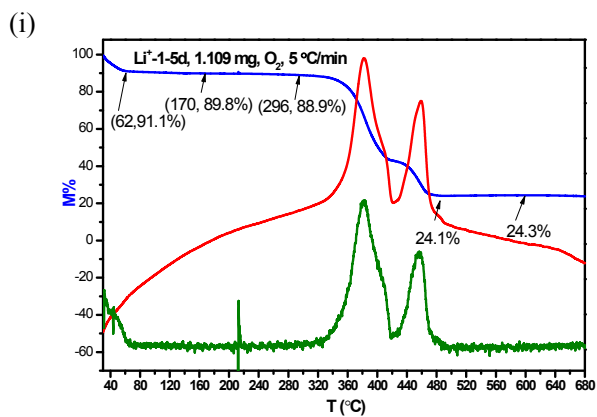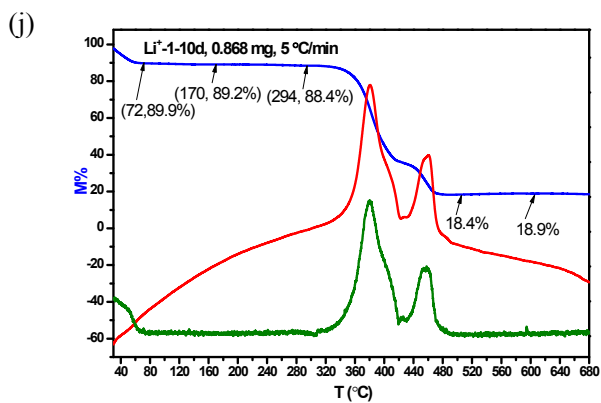

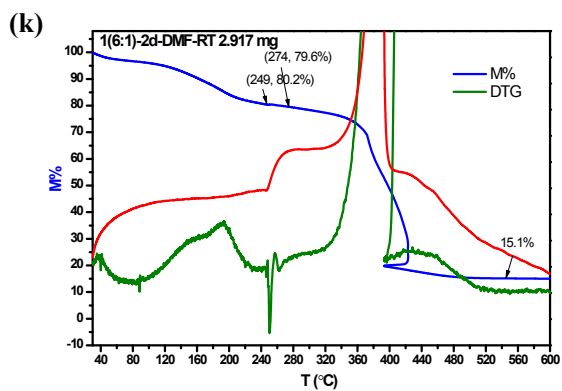

Fig. S5 TG (blue)/DTA(red)/DTG(green) of MOF 1 and its derived products.

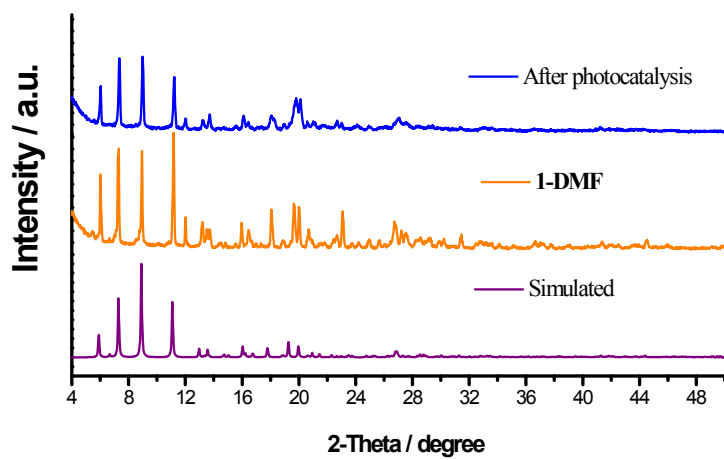

Fig. S6 PXRD spectrum of 1-DMF after two cycles of photocatalytic CO<sub>2</sub> reduction.

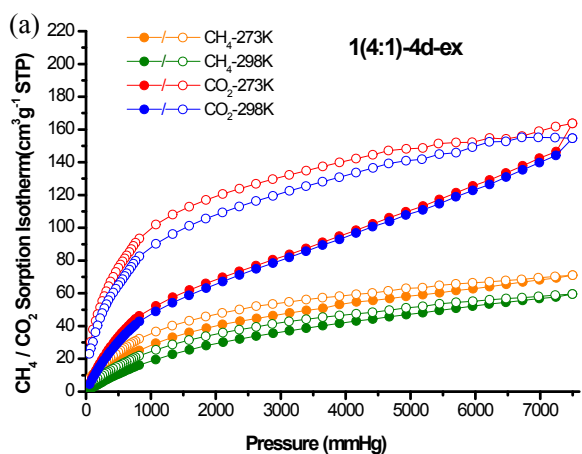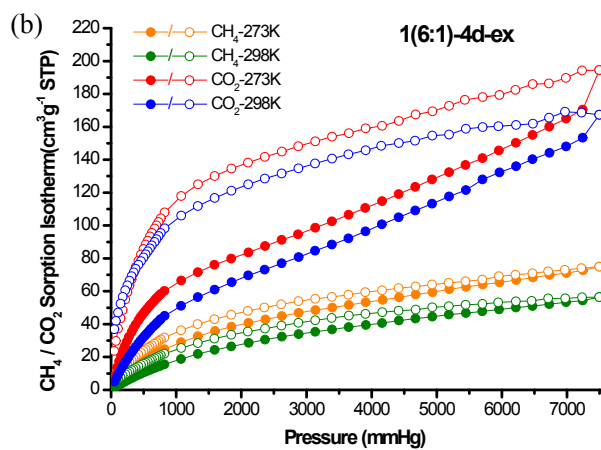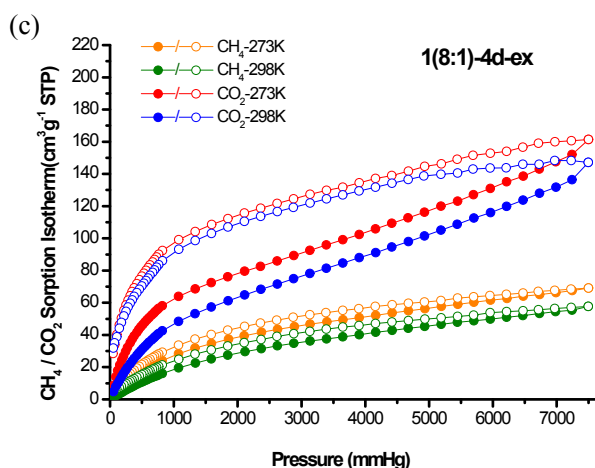

Fig. S7 CO<sub>2</sub> (273 and 298 K) and CH<sub>4</sub> (273 and 298 K) adsorption/desorption isotherms of 1(4:1)-4d-ex (a), 1(6:1)-4d-ex (b), and 1(8:1)-4d-ex (c).

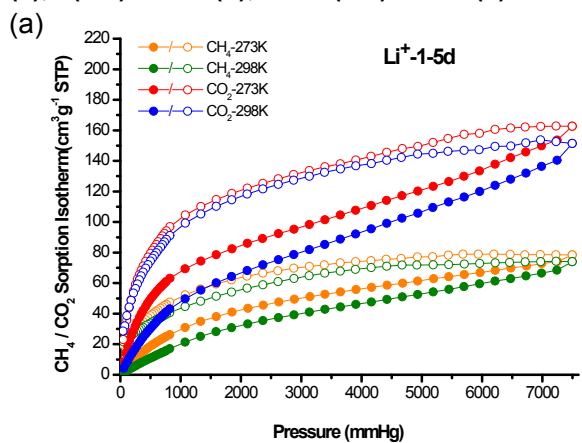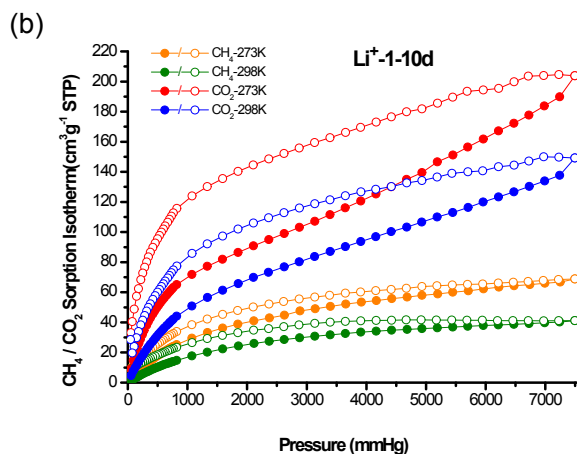

Fig. S8 CO<sub>2</sub> (273 and 298 K) and CH<sub>4</sub> (273 and 298 K) adsorption/desorption isotherms of Li<sup>+</sup>-1-5d (a) and Li<sup>+</sup>-1-10d (b).

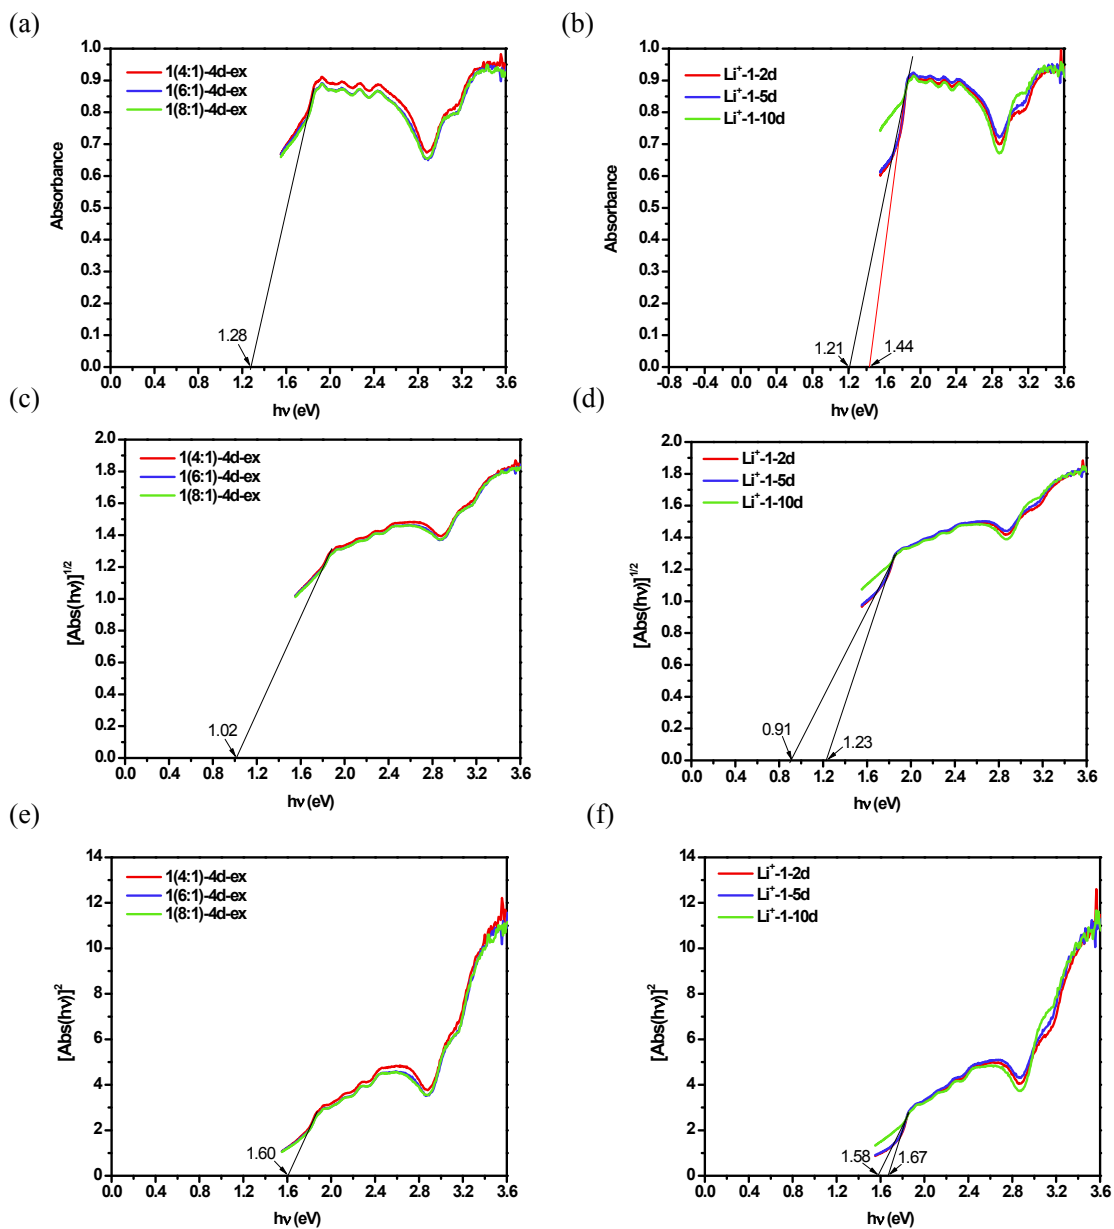

**Fig. S9** Band gaps of 1(4:1)-4d-ex, 1(6:1)-4d-ex, 1(8:1)-4d-ex,  $\text{Li}^+$ -1-2d,  $\text{Li}^+$ -1-5d, and  $\text{Li}^+$ -1-10d determined by plots of  $(\text{abs or } [\text{abs}(h\nu)]^{1/2} \text{ or } [\text{abs}(h\nu)]^2$  versus  $h\nu$ .

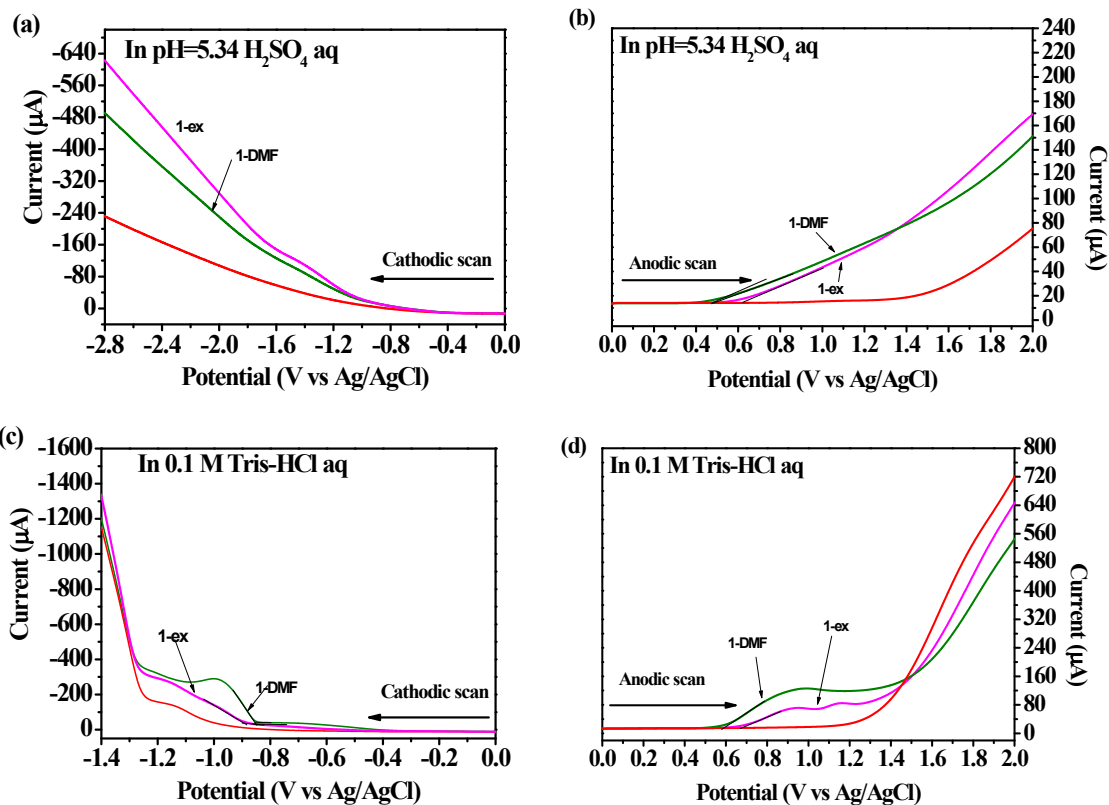

**Fig. S10** Cathodic and anodic linear potential scans for determining the positions of the CB and VB edges of 1-DMF, and 1-ex using pH=5.34 H<sub>2</sub>SO<sub>4</sub> aqueous solution or the **Tris-HCl buffered saline solution (0.1 mol L<sup>-1</sup>, pH 7.4)**. The red curves are the currents of the electrolytes using the unmodified ITO electrodes.

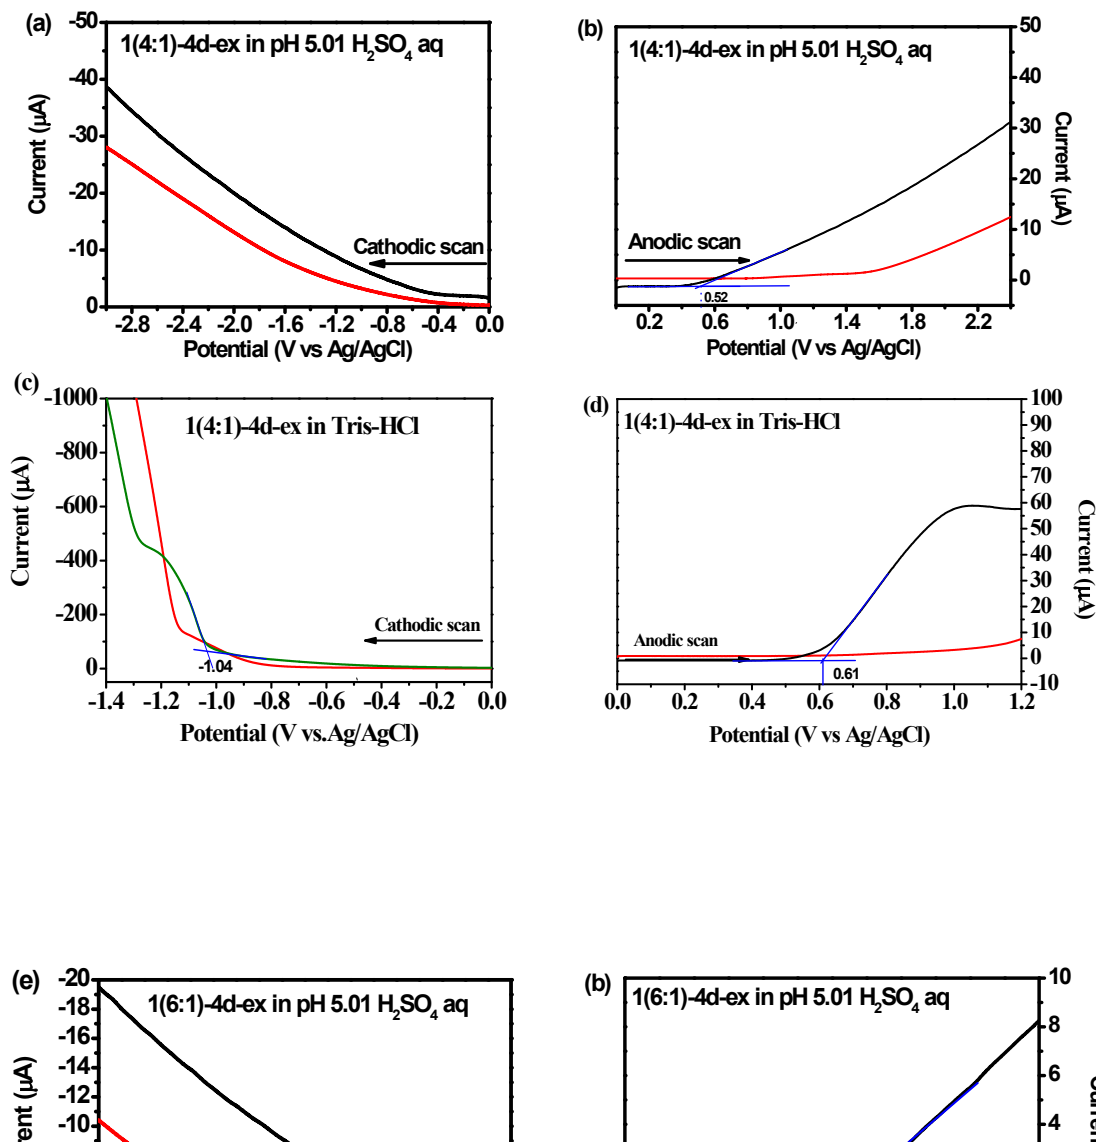



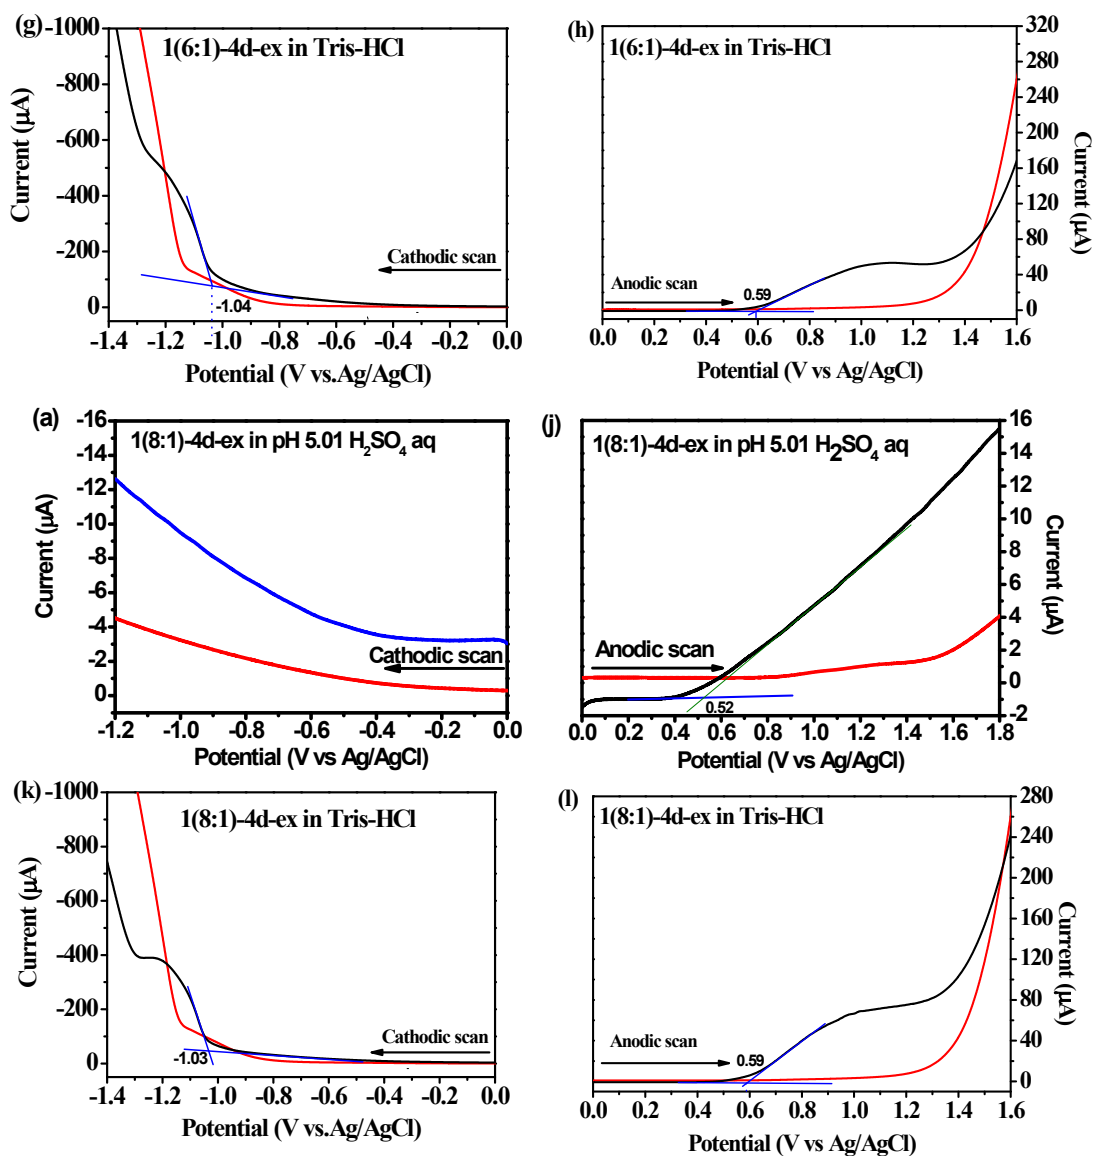

Fig. S11 Cathodic and anodic linear potential scans for determining the positions of the CB and VB edges of 1(4:1)-4d-ex ((a)-(d)), 1(6:1)-4d-ex ((e)-(h)) and 1(8:1)-4d-ex ((i)-(l)) using two different electrolytes (the pH 5.01 H<sub>2</sub>SO<sub>4</sub> aqueous solution or the Tris-HCl buffered saline solution (0.1 mol·L<sup>-1</sup>, pH 7.4)). The red curves are the currents of the electrolytes using the unmodified ITO electrodes.

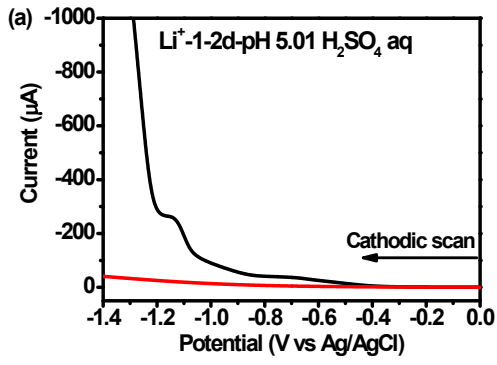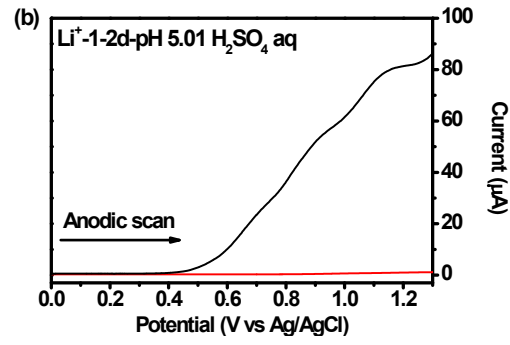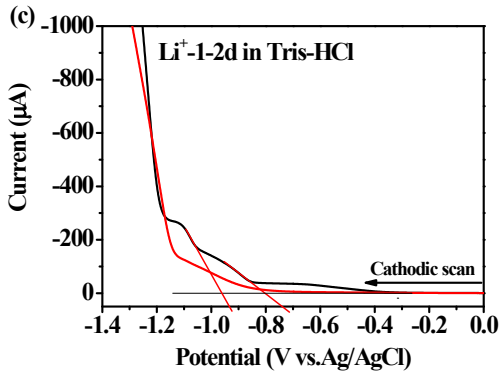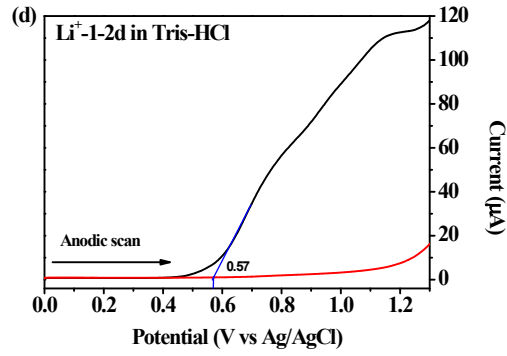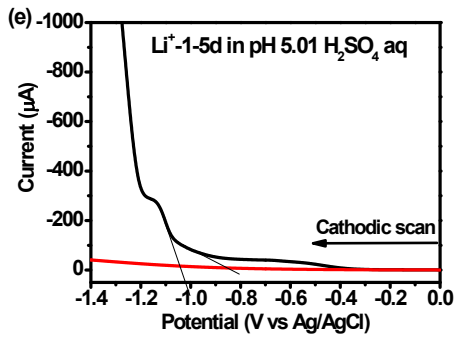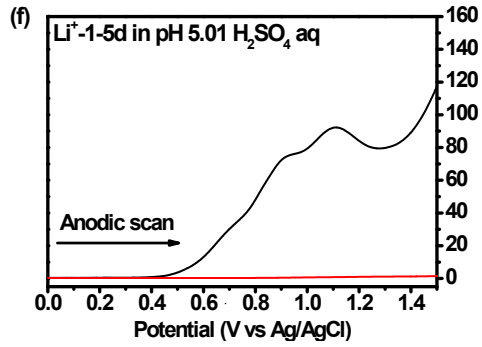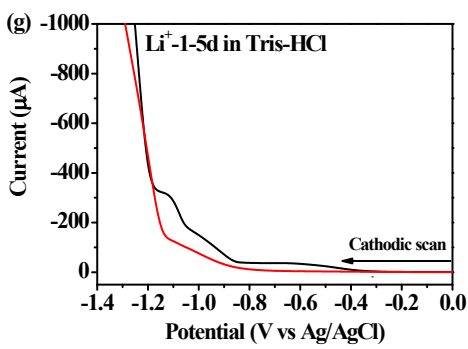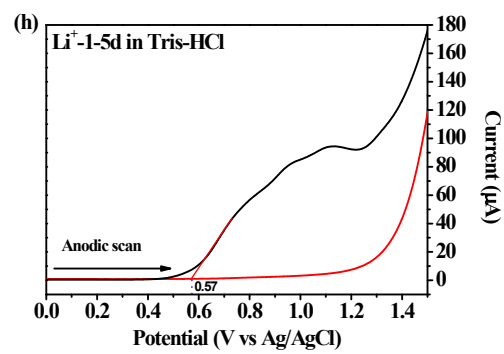

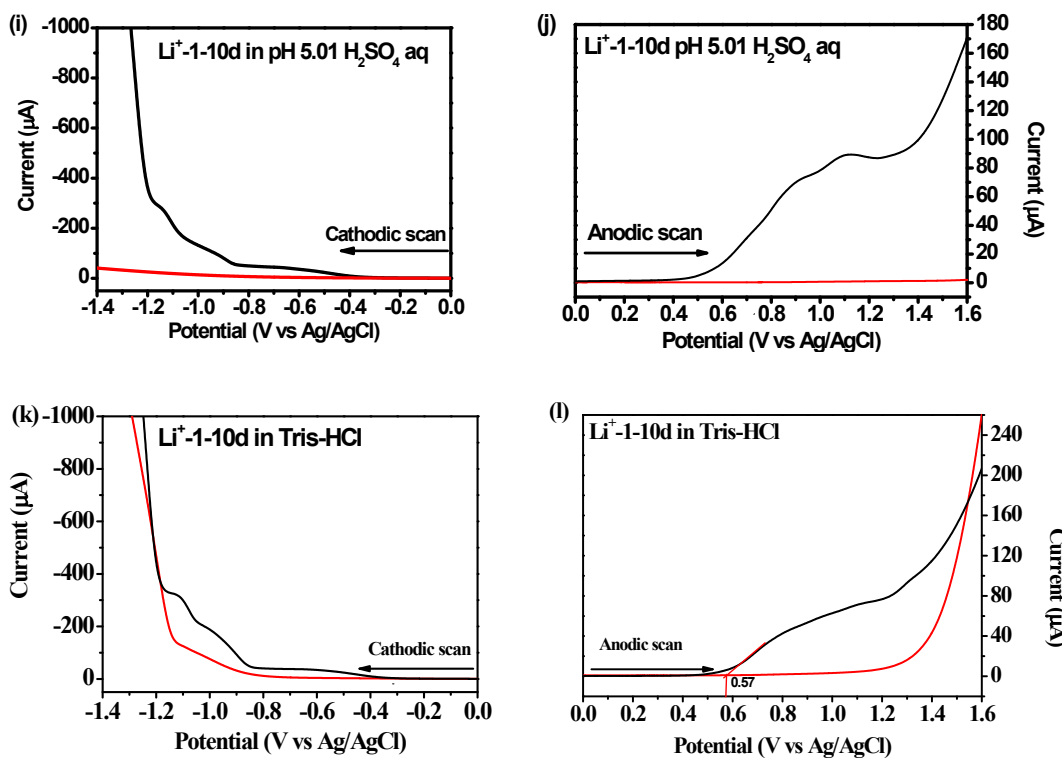

**Fig. S12** Cathodic and anodic linear potential scans for determining the positions of the CB and VB edges of **Li<sup>+</sup>-1-2d** ((a)-(d)), **Li<sup>+</sup>-1-5d** ((e)-(h)) and **Li<sup>+</sup>-1-10d** ((i)-(l)) using two different electrolytes (the pH 5.01 H<sub>2</sub>SO<sub>4</sub> aqueous solution or the **Tris-HCl buffered saline solution (0.1 mol L<sup>-1</sup>, pH 7.4)**). The red curves are the currents of the electrolytes using the unmodified ITO electrodes.

## References

1. V. A. Blatov, A. P. Shevchenko and D. M. Proserpio, *Cryst. Growth Des.*, 2014, **14**, 3576–3586.
2. N. L. Rosi, J. Kim, M. Eddaoudi, B. Chen, M. O’Keeffe and O. M. Yaghi, *J. Am. Chem. Soc.*, 2005, **127**, 1504-1518.
3. M. H. Xie, X. L. Yang and C. D. Wu, *Chemical Communications*, 2011, **47**, 5521-5523.
4. R.-J. Li, M. Li, X.-P. Zhou, D. Li and M. O’Keeffe, *Chemical Communications*, 2014, **50**, 4047-4049.
5. R. Rahimi, S. Saadati and E. H. Fard, *Environmental Progress & Sustainable Energy*, 2015, **34**, 1341-1348.
6. Q. Wang, W. M. Campbell, E. E. Bonfantani, K. W. Jolley, D. L. Officer, P. J. Walsh, K. Gordon, R. Humphry-Baker, M. K. Nazeeruddin and M. Gratzel, *Journal of Physical Chemistry B*, 2005, **109**, 15397-15409.
7. G. Granados-Oliveros, E. A. Paez-Mozo, F. Martinez Ortega, C. Ferronato and J.-M. Chovelon, *Applied Catalysis B-Environmental*, 2009, **89**, 448-454.
